# Supplementary material
Source: PubMed Central journal article supplement (PMC10184040)
Supplement: mmc1.pdf [file mmc1.pdf]

## Supplementary Materials for

### **Oral Azvudine for hospitalized COVID-19 patients with pre-existing conditions: a retrospective cohort study**

Yuming Sun<sup>1-6#</sup>, MD; Liping Jin<sup>1-5#</sup>, MD; Yating Dian<sup>1-5#</sup>, MD; Minxue Shen<sup>1-5, 7\*</sup>, PhD; Furong Zeng<sup>8\*</sup>, MD; Xiang Chen<sup>1-5\*</sup>, MD; Guangtong Deng<sup>1-5\*</sup>, MD

#### **This PDF file includes:**

**Supplementary Fig. 1.** Standard mean differences between the groups before and after 1:1 propensity score-matching.

**Supplementary Table 1.** Propensity-score model conditional on baseline covariates.

**Supplementary Table 2.** Laboratory parameters between the two groups.

Supplementary Fig. 1

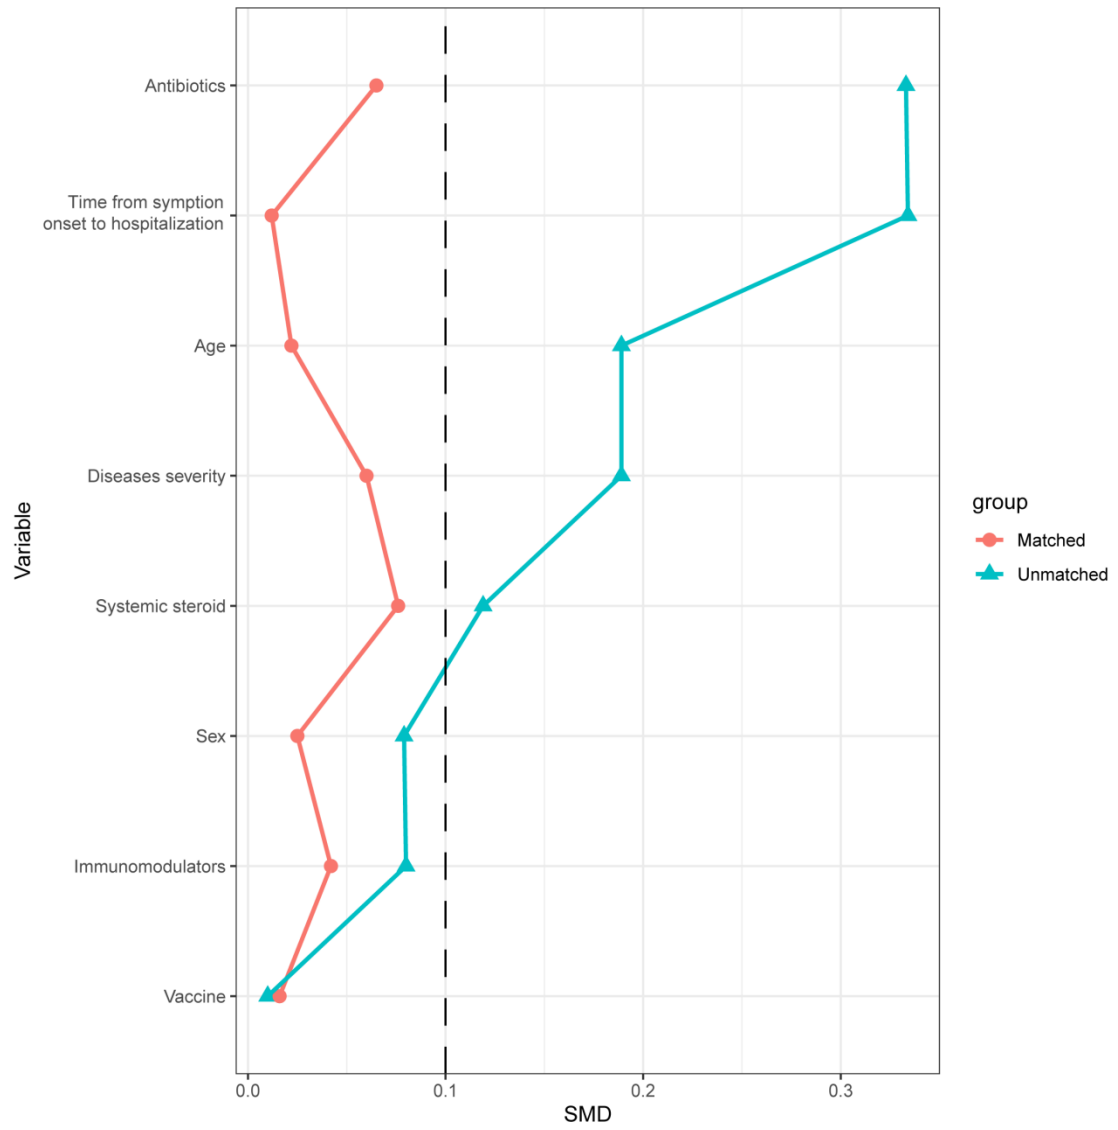

**Supplementary Table 1. Propensity-score model conditional on baseline covariates**

| Covariates                                             | Coefficients | Standard Errors | P values |
|--------------------------------------------------------|--------------|-----------------|----------|
| Intercept                                              | -2.185619    | 0.522340        | 2.86e-05 |
| Age (years)                                            | 0.004412     | 0.005592        | 0.430118 |
| Gender (female vs. male)                               | -0.077771    | 0.157773        | 0.622062 |
| Severity at admission (severe vs. non-severe)          | -0.146920    | 0.166242        | 0.376818 |
| COVID-19 vaccination status (vaccinated vs. unknown)   | 0.149249     | 0.154748        | 0.334811 |
| Time from symptom onset to treatment (0–5 vs. >5 days) | 0.725780     | 0.218937        | 0.000916 |
| Systemic steroid (yes vs. no)                          | 0.035365     | 0.181723        | 0.845697 |
| Antibiotics (yes vs. no)                               | 0.544309     | 0.155723        | 0.000473 |
| Immunomodulators (yes vs. no)                          | 0.550108     | 0.194569        | 0.004694 |

**Supplementary Table 2. Laboratory parameters between the two groups.**

| Category                           | Indicator                          | Azvudine      |                 | Matched Control |                |
|------------------------------------|------------------------------------|---------------|-----------------|-----------------|----------------|
|                                    |                                    | No. patients  | Mean (SD)       | No. patients    | Mean (SD)      |
| Arterial blood gas analysis        | PaO <sub>2</sub>                   | 127           | 106.04 (46.11)  | 123             | 101.81 (42.84) |
|                                    | PaCO <sub>2</sub>                  | 127           | 36.09 (7.30)    | 123             | 35.67 (6.68)   |
|                                    | PaO <sub>2</sub> /FiO <sub>2</sub> | 116           | 368.06 (172.35) | 115             | 352.96 (154.6) |
| Blood cell count                   | Red blood cell                     | 241           | 4.16 (2.12)     | 242             | 4.63 (10.72)   |
|                                    | Hemoglobin                         | 241           | 124.83 (73.56)  | 242             | 117.86 (21.37) |
|                                    | White blood cell                   | 241           | 6.54 (3.33)     | 242             | 7.07 (3.33)    |
|                                    | Blood platelet                     | 241           | 206.40 (92.23)  | 242             | 228.11 (97.45) |
|                                    | Lymphocyte                         | 241           | 1.07 (0.96)     | 242             | 1.17 (1.48)    |
|                                    | Lymphocyte (%)                     | 240           | 17.72 (10.52)   | 242             | 17.53 (11.38)  |
|                                    | Neutrophil                         | 240           | 5.11 (4.28)     | 242             | 5.86 (7.14)    |
|                                    | Neutrophil (%)                     | 240           | 71.69 (12.83)   | 242             | 71.54 (14.29)  |
|                                    | Eosinophil                         | 240           | 0.12 (0.40)     | 242             | 0.14 (0.35)    |
|                                    | Basophil                           | 240           | 0.04 (0.12)     | 242             | 0.05 (0.11)    |
| Liver, renal, and cardiac function | Total bilirubin                    | 235           | 10.97 (9.93)    | 236             | 13.55 (22.81)  |
|                                    | Direct bilirubin                   | 235           | 3.86 (1.81)     | 236             | 5.70 (14.39)   |
|                                    | Albumin                            | 235           | 33.99 (4.23)    | 236             | 33.61 (4.68)   |
|                                    | Globulin                           | 235           | 28.27 (4.54)    | 236             | 28.65 (5.01)   |
|                                    | ALT                                | 234           | 31.63 (25.48)   | 236             | 34.67 (52.23)  |
|                                    | AST                                | 234           | 32.46 (20.83)   | 236             | 35.31 (34.26)  |
|                                    | Blood creatinine                   | 235           | 100.40 (126.85) | 238             | 121.08 (168.3) |
|                                    | BUN                                | 235           | 7.55 (5.98)     | 238             | 7.86 (6.79)    |
|                                    | K <sup>+</sup>                     | 240           | 3.98 (0.80)     | 235             | 5.77 (28.19)   |
|                                    | Ca <sup>2+</sup>                   | 240           | 2.18 (1.18)     | 235             | 2.12 (0.15)    |
|                                    | Na <sup>+</sup>                    | 240           | 139.64 (3.99)   | 235             | 139.35 (4.39)  |
| Cl <sup>-</sup>                    | 240                                | 103.47 (4.49) | 235             | 107.06 (61.03)  |                |

|             |                           |     |                 |     |                  |
|-------------|---------------------------|-----|-----------------|-----|------------------|
|             | Mg <sup>2+</sup>          | 176 | 1.33 (6.42)     | 178 | 0.83 (0.11)      |
|             | Lactic dehydrogenase      | 224 | 238.18 (86.57)  | 213 | 236.15 (99.75)   |
|             | Creatine kinase           | 224 | 103.38 (178.63) | 213 | 107.04 (198.1)   |
|             | creatine kinase MB        | 224 | 12.63 (10.65)   | 213 | 11.29 (15.00)    |
|             | Myohemoglobin             | 224 | 95.16 (106.01)  | 213 | 125.57 (172.42)  |
|             | Troponin                  | 164 | 2.91 (36.85)    | 142 | 0.02 (0.07)      |
|             | Brain natriuretic peptide | 169 | 962.67 (2016.5) | 157 | 1659.95 (5206.3) |
| Coagulation | D-Dimer                   | 215 | 0.46 (1.34)     | 210 | 0.54 (1.53)      |
|             | PT                        | 211 | 12.23 (3.30)    | 205 | 12.36 (4.16)     |
|             | INR                       | 211 | 1.05 (0.32)     | 205 | 1.06 (0.41)      |
|             | Fibrinogen                | 210 | 4.49 (1.45)     | 205 | 4.49 (1.61)      |
|             | APTT                      | 210 | 28.39 (4.56)    | 205 | 28.55 (5.36)     |
|             | TT                        | 209 | 17.19 (6.37)    | 205 | 17.32 (8.55)     |
| Cytokines   | TNF- $\alpha$             | 98  | 11.54 (15.44)   | 88  | 8.46 (6.64)      |
|             | IL-6                      | 175 | 24.62 (68.69)   | 150 | 47.53 (351.60)   |
|             | IL-10                     | 100 | 6.98 (9.16)     | 94  | 6.60 (15.25)     |
| Other       | Lactic acid               | 87  | 1.59 (0.69)     | 69  | 1.72 (0.83)      |
|             | Procalcitonin             | 187 | 0.28 (1.71)     | 186 | 0.95 (5.66)      |
|             | C-reactive protein        | 194 | 45.78 (50.10)   | 188 | 38.13 (45.39)    |
|             | ESR                       | 148 | 56.07 (27.28)   | 151 | 60.85 (28.61)    |

No., number of; SD, standard deviation. BUN, Blood urea nitrogen; ESR, Erythrocyte sedimentation rate.
